# Supplementary material for: Hydrogen Sulfide Inhibits High Glucose-Induced sFlt-1 Production via Decreasing ADAM17 Expression in 3T3-L1 Adipocytes
Source: Hindawi journal article supplement (doi:10.1155/2017/9501792), 2017-01-01
Supplement: f2 [file 9501792.f2.pdf]

## Supplements

Table.S1. The siRNA sequences for CSE, 3-MST, ADAM17

| Target gene |                   | SiRNA sequence        |
|-------------|-------------------|-----------------------|
| CSE         | Sense(5'–3')      | CUGCCAUGACCUGCUAAAtt  |
|             | Acti-sense(5'–3') | UUUAGCAGGUCAAUGGCAGtt |
| 3-MST       | Sense(5'–3')      | GCUCAGUAAACAUCCCGUUt  |
|             | Acti-sense(5'–3') | AACGGGAUGUUUACUGAGCca |
| ADAM17      | Sense(5'–3')      | GGACCAAGGAGGAAAGUAUtt |
|             | Acti-sense(5'–3') | AUACUUUCCUCCUUGGUCCtt |

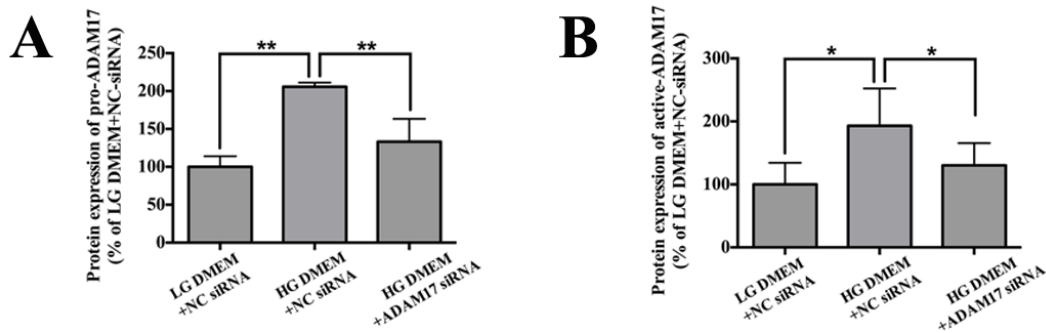

**Fig.S1.** The effects of high glucose on pro-ADAM17(A) and active-ADAM17(B) expression were not occurred in 3T3-L1 adipocytes transfected with ADAM17-siRNA. The protein expression of ADAM17 in 3T3-L1 adipocytes were determined by western-blotting as described in materials and methods. Data were presented as mean  $\pm$  SEM (n=3 cultures). \*P<0.05, \*\*P<0.01 vs indicated.

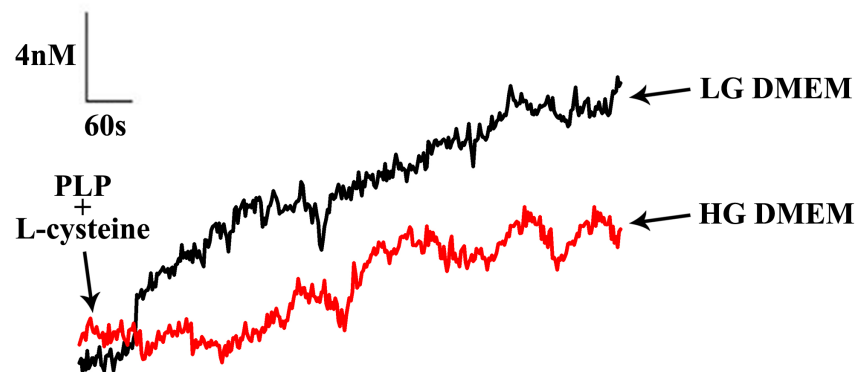

**Fig.S2.** The effects of high glucose on real-time H<sub>2</sub>S production in adipocyte. The real-time H<sub>2</sub>S production rate was significantly decreased in adipocyte treated with high glucose. The real-time H<sub>2</sub>S production in adipocyte was determined by using aminiaturized H<sub>2</sub>S micro-respiration sensor.

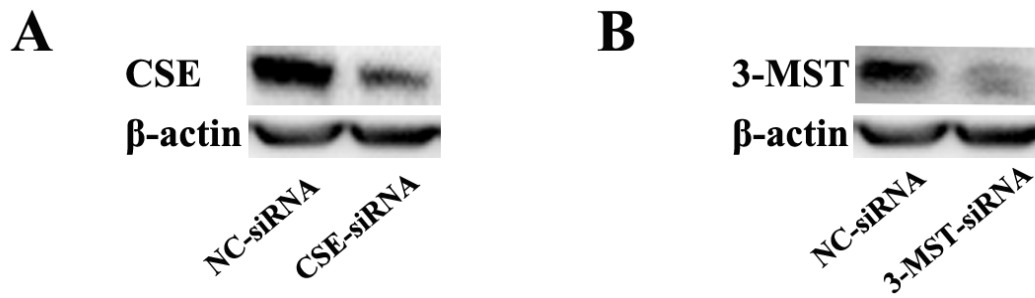

**Fig.S3.** Representative protein bands of CSE(A) and 3-MST(B) in 3T3-L1 adipocytes transfected with CSE-siRNA and 3-MST-siRNA. The protein expression of CSE and 3-MST in 3T3-L1 adipocytes were determined by western-blotting as described in materials and methods.
